# Supplementary material
Source: PubMed Central journal article supplement (PMC6051723)
Supplement: NIHMS926632-supplement-supplement_1.pdf [file NIHMS926632-supplement-supplement_1.pdf]

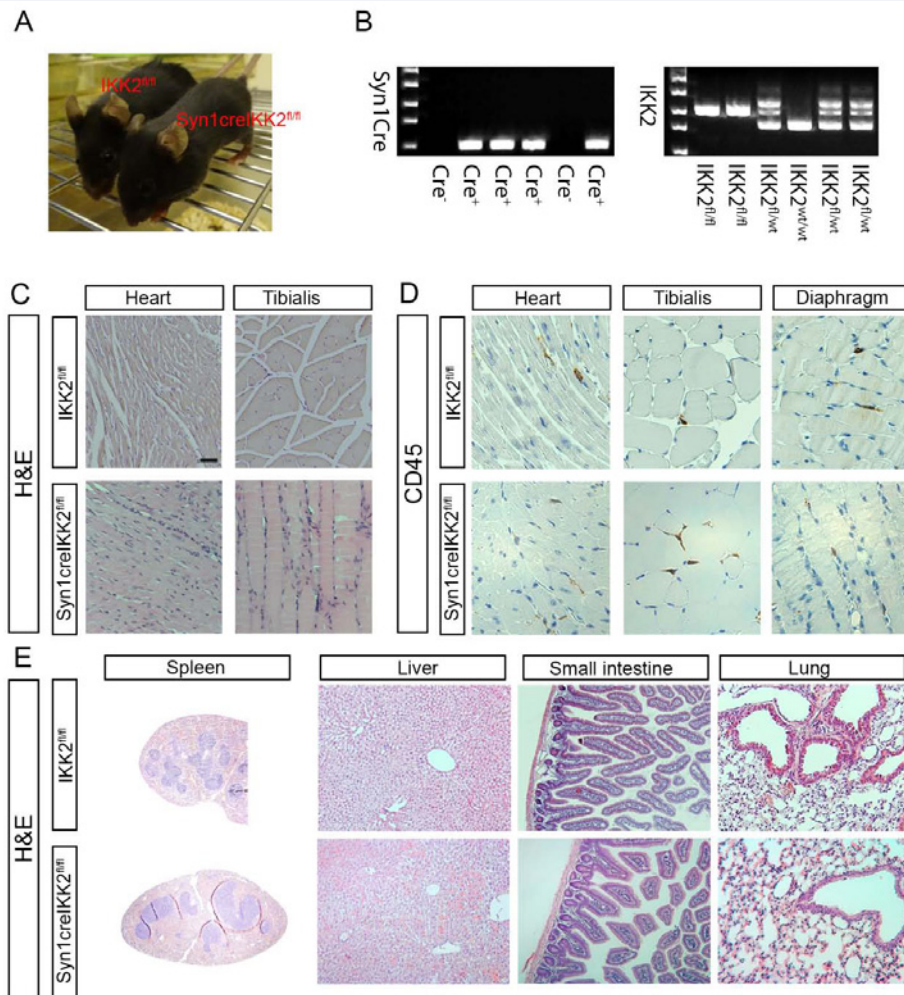

**Supplemental Figure 1** Characterization of Syn1creIKK2<sup>fl/fl</sup> and IKK2<sup>fl/fl</sup> mice. **(A)** Representative image of female IKK2<sup>fl/fl</sup> and Syn1creIKK2<sup>fl/fl</sup> mice. **(B)** RT-PCR analysis of cre (left) and IKK2<sup>fl/fl</sup> (right) gene expression. **(C)** Representative photomicrographs of haematoxylin and eosin (H&E) stained tissue sections from heart and tibialis musculature showing comparable muscle phenotypes in IKK2<sup>fl/fl</sup> and Syn1creIKK2<sup>fl/fl</sup> mice (n=3 mice/group). **(D)** Representative photomicrographs of anti-CD45 stained tissue sections derived from heart, tibialis and diaphragm musculature showing similar muscle phenotypes in IKK2<sup>fl/fl</sup> and Syn1creIKK2<sup>fl/fl</sup> mice (n=3 mice/group). **(E)** Representative photomicrographs of H&E stained spleen, liver, small intestine and lung tissue sections from IKK2<sup>fl/fl</sup> and Syn1creIKK2<sup>fl/fl</sup> (n=3 mice/group). Scale bars: C, D =40µm; E =200µm for spleen and 40µm for liver, small intestine and lung.

#### Cite this article

Ellman DG, Novrup HG, Jørgensen LH, Lund MC, Yli-Karjanmaa M, et al. (2017) Neuronal Ablation of IKK2 Decreases Lesion Size and Improves Functional Outcome after Spinal Cord Injury in Mice. *JSM Neurosurg Spine* 5(2): 1090.
